# Supplementary material
Source: PubMed Central journal article supplement (PMC7659241)
Supplement: CAS-103-1493-s001.pdf [file CAS-103-1493-s001.pdf]

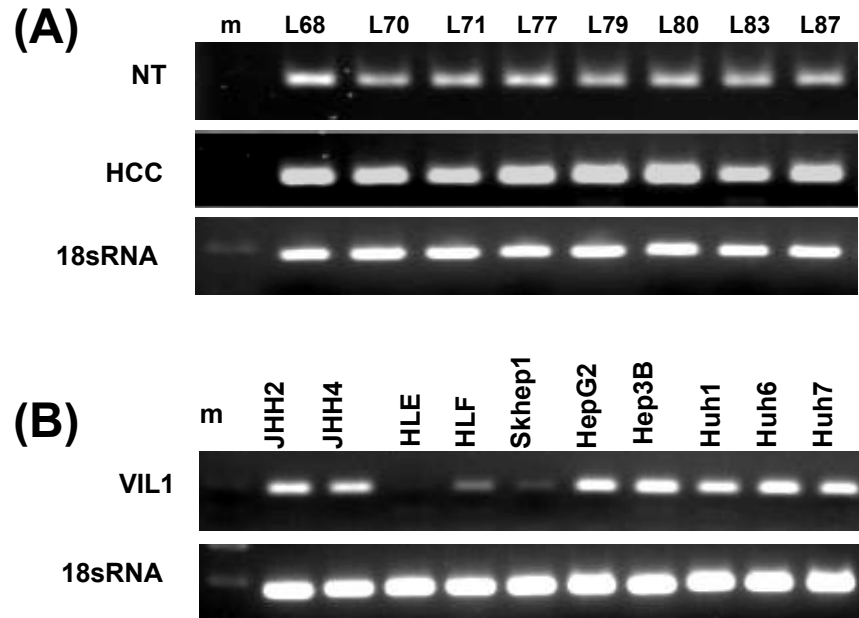

**Fig. S1.** Expression of VIL1 mRNA in HCC tissues and cell lines. (A) cancer and adjacent non-tumor tissues (NT). (B) in hepatoma cell lines.
